# Supplementary material for: Mutation Analysis of the Common Deafness Genes in Patients with Nonsyndromic Hearing Loss in Linyi by SNPscan Assay
Source: Hindawi journal article supplement (doi:10.1155/2016/1302914), 2016-01-01
Supplement: f1 [file 1302914.f1.pdf]

## Supplement material

Table S1. 115 mutations of the 3 deafness causing genes detected in the study

| gene        | allele         | Category   |
|-------------|----------------|------------|
| <i>GJB2</i> | IVS1+1G>A      | Pathogenic |
|             | 1A>G           | Pathogenic |
|             | 9G>A           | Unknown    |
|             | 23C>T          | Pathogenic |
|             | 35delG         | Pathogenic |
|             | 34_35insG      | Pathogenic |
|             | 95G>T          | Pathogenic |
|             | 95G>A          | Pathogenic |
|             | 109G>A         | Pathogenic |
|             | 134G>A         | Pathogenic |
|             | 139G>T         | Pathogenic |
|             | 157T>A         | Pathogenic |
|             | 164C>A         | Pathogenic |
|             | 167delT        | Pathogenic |
|             | 176_191del16   | Pathogenic |
|             | 187G>T         | Pathogenic |
|             | 230G>A         | Pathogenic |
|             | 232G>A         | Pathogenic |
|             | 235delC        | Pathogenic |
|             | 257C>G         | Pathogenic |
|             | 283G>A         | Pathogenic |
|             | 287C>G         | Pathogenic |
|             | 299_300delAT   | Pathogenic |
|             | 313_326del14   | Pathogenic |
|             | 358_360delGAG  | Pathogenic |
|             | 382A>G         | Pathogenic |
|             | 408C>A         | Pathogenic |
|             | 416G>A         | Pathogenic |
|             | 427C>T         | Pathogenic |
|             | 439G>A         | Pathogenic |
|             | 493C>T         | Pathogenic |
|             | 511_512insAACG | Pathogenic |
|             | 571T>C         | Unknown    |
|             | 583A>G         | Pathogenic |
|             | 598G>A         | Pathogenic |
|             | 605ins46       | Pathogenic |
|             | 109G>T         | Pathogenic |
|             | 147C>G         | Unknown    |
|             | 170C>A         | Pathogenic |
|             | 227C>T         | Pathogenic |
|             | 230A>T         | Pathogenic |

|                |                     |            |
|----------------|---------------------|------------|
|                | 235C>T              | Pathogenic |
|                | 249G>A              | Pathogenic |
|                | 269C>T              | Pathogenic |
|                | 279T>A              | Pathogenic |
|                | 281C>T              | Pathogenic |
|                | 387delC             | Pathogenic |
|                | 398C>T              | Pathogenic |
|                | 404A>G              | Pathogenic |
|                | 414delT             | Pathogenic |
|                | 421T>C              | Pathogenic |
|                | 439A>G              | Pathogenic |
|                | 563T>C              | Pathogenic |
|                | 589G>A              | Pathogenic |
|                | 665G>T              | Pathogenic |
|                | 668T>C              | Pathogenic |
|                | 754T>C              | Pathogenic |
|                | 766 -2A>G           | Pathogenic |
|                | 907G>C              | Pathogenic |
|                | 916_917insG         | Pathogenic |
| <i>SLC26A4</i> | 919-2A>G(ivs7-2)    | Pathogenic |
|                | 946G>T              | Pathogenic |
|                | 1001+1G>A           | Pathogenic |
|                | 1022delC            | Pathogenic |
|                | 1079C>T             | Pathogenic |
|                | 1105A>G             | Pathogenic |
|                | 1160C>T             | Pathogenic |
|                | 1173C>A             | Pathogenic |
|                | 1174A>T             | Pathogenic |
|                | 1225C>T             | Pathogenic |
|                | 1226G>A             | Pathogenic |
|                | 1229C>T             | Pathogenic |
|                | 1238A>G             | Pathogenic |
|                | 1240-1243GAGA>AAAAG | Pathogenic |
|                | 1262A>C             | Pathogenic |
|                | 1264G>A             | Pathogenic |
|                | 1318A>T             | Pathogenic |
|                | 1327G>C             | Pathogenic |
|                | 1334T>G             | Pathogenic |
|                | 1336C>T             | Pathogenic |
|                | 1340delA            | Pathogenic |
|                | 1343C>A             | Pathogenic |
|                | 1343C>T             | Pathogenic |
|                | 1371C>A             | Pathogenic |
|                | 1489G>A             | Pathogenic |

|                     |                         |            |
|---------------------|-------------------------|------------|
|                     | 1517T>G                 | Pathogenic |
|                     | 1520delT                | Pathogenic |
|                     | 1522A>G                 | Pathogenic |
|                     | 1540C>T                 | Pathogenic |
|                     | 1547_1548InsC           | Pathogenic |
|                     | 1586T>G                 | Pathogenic |
|                     | 1594A>C                 | Pathogenic |
|                     | 1595G>T                 | Pathogenic |
|                     | 1614+9C>T               | Pathogenic |
|                     | 1615A>G                 | Pathogenic |
|                     | 1673A>T                 | Pathogenic |
|                     | 1686_1687insA           | Pathogenic |
|                     | 1699A>T                 | Pathogenic |
|                     | 1707+1G>A               | Pathogenic |
|                     | IVS15+5G>A (1707+5 G>A) | Pathogenic |
|                     | 1829C>A                 | Pathogenic |
|                     | 1927G>T                 | Pathogenic |
|                     | 1949T>A                 | Pathogenic |
|                     | 1975G>C                 | Pathogenic |
|                     | 1985G>A                 | Pathogenic |
|                     | 1991C>T                 | Pathogenic |
|                     | 2014G>A                 | Pathogenic |
|                     | 2027T>A                 | Pathogenic |
|                     | 2054G>T                 | Pathogenic |
|                     | 2086C>T                 | Pathogenic |
|                     | 2162C>T                 | Pathogenic |
|                     | 2167C>G                 | Pathogenic |
|                     | 2168A>G                 | Pathogenic |
|                     | <hr/>                   |            |
| <i>mtDNA12SrRNA</i> | 1494 C>T                | Pathogenic |
|                     | 1555 A>G                | Pathogenic |

---
